# Supplementary material for: Quantification of absolute labeling efficiency at the single-protein level
Source: PubMed Central journal article supplement (PMC11399078; doi:10.1038/s41592-024-02242-5), 2024-04-24
Supplement: 41592_2024_2242_MOESM1_ESM.pdf [file 41592_2024_2242_MOESM1_ESM.pdf]

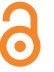

---

# Quantification of absolute labeling efficiency at the single-protein level

---

In the format provided by the authors and unedited

## Supplementary Information

Supplementary Table 1 | Labeling efficiency – Tag-proteins

| Target                | Binder   | Clone                                | Terminus | Total area ( $\mu\text{m}^2$ ) | Target density ( $\mu\text{m}^{-2}$ ) | Labeling efficiency (%) | Target-Reference offset (nm) | Cells (n) | Repeats (n) |
|-----------------------|----------|--------------------------------------|----------|--------------------------------|---------------------------------------|-------------------------|------------------------------|-----------|-------------|
| CD86 - mEGFP          | Nanobody | 1H1                                  | C        | $354.0 \pm 57.4$               | $48.8 \pm 33.7$                       | $47.3 \pm 2.7$          | $10.3 \pm 0.7$               | 6         | 3           |
| CD86 - mEGFP          | Nanobody | 1B2                                  | C        | $547.5 \pm 77.4$               | $22.3 \pm 8.3$                        | $43.8 \pm 2.0$          | $10.3 \pm 0.5$               | 5         | 2           |
| CD86 - ALFA-tag       | Nanobody | 1G5                                  | C        | $525.4 \pm 130.5$              | $29.6 \pm 17.0$                       | $42.0 \pm 5.1$          | $11.8 \pm 0.3$               | 6         | 3           |
| CD86 - mEGFP          | Nanobody | 1H1<br>1B2                           | C        | $331.8 \pm 0.0$                | $28.9 \pm 15.9$                       | $61.8 \pm 5.4$          | $13.5 \pm 1.7$               | 5         | 2           |
| CD86 – ALFA-tag-mEGFP | Nanobody | 1H1 (GFP)<br>1B2 (GFP)<br>1G5 (Alfa) | C        | $337.4 \pm 68.0$               | $19.5 \pm 8.4$                        | $76.2 \pm 8.4$          | $15.0 \pm 0.1$               | 6         | 2           |
| CD86 - mCherry        | Nanobody | 2B12                                 | C        | $360.3 \pm 73.0$               | $47.1 \pm 33.7$                       | $19.7 \pm 2.5$          | $11.3 \pm 0.5$               | 7         | 3           |
| CD86 - TagRFP         | Nanobody | 1H7                                  | C        | $404.8 \pm 88.2$               | $26.0 \pm 15.2$                       | $41.4 \pm 3.4$          | $11.8 \pm 0.4$               | 5         | 2           |
| CD86 - mEOS2          | Nanobody | 1E8                                  | C        | $391.6 \pm 115.3$              | $13.3 \pm 8.0$                        | $5.8 \pm 1.3$           | $11.8 \pm 0.4$               | 5         | 2           |
| CD86 - mNeonGreen     | Nanobody | 1E2                                  | C        | $388.7 \pm 105.0$              | $40.3 \pm 30.4$                       | $35.7 \pm 4.1$          | $11.9 \pm 0.3$               | 7         | 3           |
| CD86 - SPOT-tag       | Nanobody | bivBC2                               | C        | $245.6 \pm 56.7$               | $15.0 \pm 5.8$                        | $10.6 \pm 1.8$          | $19.0 \pm 1.2$               | 5         | 2           |
| CD86 - mEGFP          | Nanobody | 1H1                                  | N        | $287.6 \pm 74.5$               | $57.3 \pm 33.3$                       | $45.2 \pm 4.8$          | $10.0 \pm 0.0$               | 6         | 3           |
| CD70 - mEGFP          | Nanobody | 1H1                                  | N        | $259.9 \pm 39.1$               | $9.3 \pm 4.5$                         | $44.3 \pm 5.1$          | $11.7 \pm 0.4$               | 6         | 3           |
| CD70 - mEGFP          | Nanobody | 1H1                                  | C        | $331.8 \pm 0.0$                | $26.9 \pm 17.3$                       | $45.6 \pm 6.5$          | $10.7 \pm 0.4$               | 7         | 3           |
| Nup96-mEGFP           | Nanobody | 1H1                                  | C        | ---                            | ---                                   | $44.7 \pm 0.5$          | ---                          | 2         | 2           |

Supplementary Table 2 | Labeling efficiency – Antibodies

| Target | Antibody conjugation | Total area ( $\mu\text{m}^2$ ) | Target density ( $\mu\text{m}^{-2}$ ) | Labeling efficiency (%) | Target-Reference offset (nm) | Cells (n) | Repeats (n) |
|--------|----------------------|--------------------------------|---------------------------------------|-------------------------|------------------------------|-----------|-------------|
| PD-L1  | TransGlutaminase     | $412.9 \pm 102.9$              | $62.0 \pm 37.2$                       | $49.8 \pm 14.2$         | $9.4 \pm 0.5$                | 9         | 3           |
| PD-L1  | GlyCLICK             | $534.9 \pm 98.3$               | $31.2 \pm 5.8$                        | $41.3 \pm 4.2$          | $9.7 \pm 0.4$                | 7         | 3           |
| CD80   | TransGlutaminase     | $327.1 \pm 9.3$                | $15.4 \pm 6.7$                        | $40.5 \pm 6.6$          | $8.7 \pm 1.0$                | 7         | 3           |
| CD80   | GlyCLICK             | $316.6 \pm 78.1$               | $32.2 \pm 30.0$                       | $5.9 \pm 3.7$           | $9.6 \pm 0.3$                | 10        | 3           |
| CD86   | TransGlutaminase     | $322.4 \pm 58.0$               | $18.2 \pm 3.6$                        | $39.5 \pm 8.3$          | $8.0 \pm 1.4$                | 7         | 3           |
| CD86   | GlyCLICK             | $298.7 \pm 71.3$               | $25.7 \pm 8.3$                        | $34.2 \pm 12.7$         | $7.8 \pm 0.4$                | 5         | 3           |

**Supplementary Table 3 | Labeling efficiency – EGFR binders**

| Target | Binder                              | Clone                | Total area ( $\mu\text{m}^2$ ) | Target density ( $\mu\text{m}^2$ ) | Labeling efficiency (%) | Target-Reference offset (nm) | Cells (n) | Repeats (n) |
|--------|-------------------------------------|----------------------|--------------------------------|------------------------------------|-------------------------|------------------------------|-----------|-------------|
| EGFR   | Affibody                            | AB95116              | 260.7 $\pm$ 26.3               | 30.9 $\pm$ 7.3                     | 17.0 $\pm$ 6.8          | 15.1 $\pm$ 0.5               | 7         | 3           |
| EGFR   | Nanobody                            | 1H1<br>1B2           | 296.5 $\pm$ 91.7               | 38.6 $\pm$ 12.8                    | 62.5 $\pm$ 4.3          | 5.1 $\pm$ 0.2                | 6         | 3           |
| EGFR   | Antibody + 2 <sup>nd</sup> nanobody | 199.12 + kLC<br>1A23 | 301.7 $\pm$ 50.0               | 38.2 $\pm$ 10.6                    | 39.5 $\pm$ 5.8          | 14.6 $\pm$ 0.4               | 11        | 3           |
| EGFR   | Antibody + 2 <sup>nd</sup> nanobody | D38B1 + IgG<br>10E10 | 354.0 $\pm$ 104.2              | 24.0 $\pm$ 8.5                     | 29.8 $\pm$ 6.1          | 12.8 $\pm$ 1.1               | 12        | 3           |

**Supplementary Table 4 | EGFR oligomerization**

| Target       | Binder                              | Clone                | Condition      | Total area ( $\mu\text{m}^2$ ) | Target density ( $\mu\text{m}^2$ ) | Labeling efficiency (%) | Target-Reference offset (nm) | Monomers (%) – LE-corrected | Dimers (%) – LE-corrected | Monomers (%)    | Dimers (%)     | Cells (n) | Repeats (n) |
|--------------|-------------------------------------|----------------------|----------------|--------------------------------|------------------------------------|-------------------------|------------------------------|-----------------------------|---------------------------|-----------------|----------------|-----------|-------------|
| EGFR (mEGFP) | Nanobody                            | 1H1<br>1B2           | Non-stimulated | 276.5 $\pm$ 89.9               | 58.6 $\pm$ 20.8                    | 62.2 $\pm$ 4.8          | 5.2 $\pm$ 0.3                | 90.5 $\pm$ 4.1              | 9.5 $\pm$ 4.1             | 93.7 $\pm$ 2.6  | 6.3 $\pm$ 2.6  | 6         | 3           |
| EGFR (mEGFP) | Nanobody                            | 1H1<br>1B2           | EGF-stimulated | 264.6 $\pm$ 76.2               | 129 $\pm$ 82                       | 59.0 $\pm$ 3.6          | 5.1 $\pm$ 0.2                | 49.3 $\pm$ 8.0              | 50.7 $\pm$ 8.0            | 67.9 $\pm$ 6.7  | 32.1 $\pm$ 6.7 | 9         | 3           |
| EGFR         | Antibody + 2 <sup>nd</sup> nanobody | 199.12 +<br>kLC 1A23 | Non-stimulated | 276.5 $\pm$ 89.9               | 38.8 $\pm$ 13.7                    | 43.5 $\pm$ 7.9          | 14.2 $\pm$ 0.6               | 93.7 $\pm$ 3.4              | 6.3 $\pm$ 3.4             | 98.7 $\pm$ 1.2  | 1.3 $\pm$ 1.2  | 6         | 3           |
| EGFR         | Antibody + 2 <sup>nd</sup> nanobody | 199.12 +<br>kLC 1A23 | EGF-stimulated | 264.6 $\pm$ 76.2               | 87.6 $\pm$ 46.0                    | 49.3 $\pm$ 4.0          | 12.0 $\pm$ 1.3               | 51.9 $\pm$ 8.5              | 48.1 $\pm$ 8.5            | 78.7 $\pm$ 3.4  | 21.3 $\pm$ 3.4 | 9         | 3           |
| EGFR         | Antibody + 2 <sup>nd</sup> nanobody | D38B1 +<br>IgG 10E10 | Non-stimulated | 276.5 $\pm$ 89.9               | 28.6 $\pm$ 12.6                    | 36.3 $\pm$ 8.1          | 14.2 $\pm$ 0.6               | 94.5 $\pm$ 2.7              | 5.5 $\pm$ 2.7             | 100.0 $\pm$ 0.0 | 0.0 $\pm$ 0.0  | 6         | 3           |
| EGFR         | Antibody + 2 <sup>nd</sup> nanobody | D38B1 +<br>IgG 10E10 | EGF-stimulated | 264.6 $\pm$ 76.2               | 38.5 $\pm$ 21.6                    | 35.4 $\pm$ 8.6          | 13.6 $\pm$ 0.8               | 49.1 $\pm$ 7.4              | 50.9 $\pm$ 7.4            | 86.6 $\pm$ 4.0  | 13.4 $\pm$ 4.0 | 9         | 3           |

**Supplementary Table 5 | Docking sequences**

| Docking strand name | Sequence            |
|---------------------|---------------------|
| 5xR1                | TCCTCCTCCTCCTCCTCCT |
| 7xR3                | CTCTCTCTCTCTCTCTC   |
| 7xR4                | ACACACACACACACACA   |
| 5xR6                | CAACAACAACAACAAC    |

**Supplementary Table 6 | Acquisition parameters for binder specificity experiments**

| Cell   | Target         | Binder                                 | Clone                | Imager-Sequence | Exposure (ms) | Frames (n) | Power (at objective, mW) | Imager concentration (pM) | Cluster radius xy | Cluster N <sub>min</sub> |
|--------|----------------|----------------------------------------|----------------------|-----------------|---------------|------------|--------------------------|---------------------------|-------------------|--------------------------|
| CHO-K1 | mEGFP          | Nanobody                               | 1H1                  | R3              | 75            | 30 000     | 25                       | 500                       | 10                | 10                       |
| CHO-K1 | mEGFP          | Nanobody                               | 1B2                  | R3              | 75            | 30 000     | 25                       | 500                       | 10                | 10                       |
| CHO-K1 | ALFA-tag       | Nanobody                               | 1G5                  | R3              | 75            | 30 000     | 25                       | 500                       | 10                | 10                       |
| CHO-K1 | mEGFP          | Nanobody                               | 1H1<br>1B2           | R3              | 75            | 30 000     | 25                       | 500                       | 10                | 10                       |
| CHO-K1 | mEGFP ALFA-tag | Nanobody                               | 1H1<br>1B2<br>1G5    | R3              | 75            | 30 000     | 25                       | 500                       | 10                | 10                       |
| CHO-K1 | mCherry        | Nanobody                               | 2B12                 | R3              | 75            | 30 000     | 25                       | 500                       | 10                | 10                       |
| CHO-K1 | TagRFP         | Nanobody                               | 1H7                  | R3              | 75            | 30 000     | 25                       | 500                       | 10                | 10                       |
| CHO-K1 | mEOS2          | Nanobody                               | 1E8                  | R3              | 75            | 30 000     | 25                       | 500                       | 10                | 10                       |
| CHO-K1 | mNeonGreen     | Nanobody                               | 1E2                  | R3              | 75            | 30 000     | 25                       | 500                       | 10                | 10                       |
| CHO-K1 | SPOT-tag       | Nanobody                               | bivBC2               | R3              | 75            | 30 000     | 25                       | 500                       | 10                | 10                       |
| CHO-K1 | mEGFP          | Nanobody                               | 1H1                  | R3              | 75            | 30 000     | 25                       | 500                       | 10                | 10                       |
| CHO-K1 | PD-L1          | Antibody                               | 10F.9G2              | R4              | 75            | 30 000     | 25                       | 500                       | 10                | 10                       |
| CHO-K1 | CD80           | Antibody                               | 16-10A1              | R3              | 75            | 30 000     | 25                       | 500                       | 10                | 10                       |
| CHO-K1 | CD86           | Antibody                               | GL-1                 | R1              | 75            | 30 000     | 25                       | 500                       | 10                | 10                       |
| CHO-K1 | EGFR           | Affibody                               | AB95116              | R3              | 75            | 30 000     | 25                       | 500                       | 10                | 10                       |
| CHO-K1 | mEGFP          | Nanobody                               | 1H1<br>1B2           | R3              | 75            | 30 000     | 25                       | 500                       | 10                | 10                       |
| CHO-K1 | EGFR           | Antibody + 2 <sup>nd</sup><br>Nanobody | 199.12<br>+ kLC 1A23 | R3              | 75            | 30 000     | 25                       | 500                       | 10                | 10                       |
| CHO-K1 | EGFR           | Antibody + 2 <sup>nd</sup><br>Nanobody | D38B1 + IgG<br>10E10 | R3              | 75            | 30 000     | 25                       | 500                       | 10                | 10                       |

**Supplementary Table 7 | Acquisition parameters for labeling efficiency experiments**

| Cell | Construct       | Target | Binder   | Clone | Imager-Sequence | Reference | Binder   | Clone | Imager-Sequence | Exposure (ms) | Frames (n) | Power (at objective, mW) | Imager conc. (pM) | Cluster radius xy | Cluster N <sub>min</sub> |
|------|-----------------|--------|----------|-------|-----------------|-----------|----------|-------|-----------------|---------------|------------|--------------------------|-------------------|-------------------|--------------------------|
| BSC1 | ALFA-CD86-mEGFP | mEGFP  | Nanobody | 1H1   | R3              | ALFA-tag  | Nanobody | 1G5   | R4              | 75            | 30 000     | 25                       | 500               | 10                | 10                       |
| BSC1 | mEGFP-CD86-ALFA | mEGFP  | Nanobody | 1H1   | R3              | ALFA-tag  | Nanobody | 1G5   | R4              | 75            | 30 000     | 25                       | 500               | 10                | 10                       |
| U2OS | Nup96-mEGFP     | mEGFP  | Nanobody | 1H1   | R3              | ---       | ---      | ---   | ---             | 150           | 30 000     | 18                       | 500               | 10                | 10                       |
| BSC1 | ALFA-CD86-mEGFP | mEGFP  | Nanobody | 1B2   | R3              | ALFA-tag  | Nanobody | 1G5   | R4              | 75            | 30 000     | 25                       | 500               | 10                | 10                       |

|            |                             |                   |                                        |                         |    |          |          |      |    |    |        |    |     |    |    |
|------------|-----------------------------|-------------------|----------------------------------------|-------------------------|----|----------|----------|------|----|----|--------|----|-----|----|----|
| BSC1       | mEGFP-<br>CD86-<br>ALFA-tag | ALFA-tag          | Nanobody                               | 1G5                     | R3 | mEGFP    | Nanobody | 1H1  | R4 | 75 | 30 000 | 25 | 500 | 10 | 10 |
| BSC1       | ALFA-<br>CD86-<br>mEGFP     | mEGFP             | Nanobody                               | 1H1<br>1B2              | R3 | ALFA-tag | Nanobody | 1G5  | R4 | 75 | 30 000 | 25 | 500 | 10 | 10 |
| BSC1       | ALFA-<br>CD86-<br>mEGFP     | mEGFP<br>ALFA-tag | Nanobody                               | 1H1<br>1B2<br>1G5       | R3 | CD86     | Antibody | GL-1 | R1 | 75 | 30 000 | 25 | 500 | 10 | 10 |
| BSC1       | ALFA-<br>CD86-<br>mEGFP     | mCherry           | Nanobody                               | 2B12                    | R3 | ALFA-tag | Nanobody | 1G5  | R4 | 75 | 30 000 | 25 | 500 | 10 | 10 |
| BSC1       | ALFA-<br>CD86-<br>mEGFP     | TagRFP            | Nanobody                               | 1H7                     | R3 | ALFA-tag | Nanobody | 1G5  | R4 | 75 | 30 000 | 25 | 500 | 10 | 10 |
| BSC1       | ALFA-<br>CD86-<br>mEGFP     | mEOS2             | Nanobody                               | 1E8                     | R3 | ALFA-tag | Nanobody | 1G5  | R4 | 75 | 30 000 | 25 | 500 | 10 | 10 |
| BSC1       | ALFA-<br>CD86-<br>mEGFP     | mNeonG<br>reen    | Nanobody                               | 1E2                     | R3 | ALFA-tag | Nanobody | 1G5  | R4 | 75 | 30 000 | 25 | 500 | 10 | 10 |
| BSC1       | ALFA-<br>CD86-<br>mEGFP     | SPOT-tag          | Nanobody                               | bivBC2                  | R3 | ALFA-tag | Nanobody | 1G5  | R4 | 75 | 30 000 | 25 | 500 | 10 | 10 |
| BSC1       | ALFA-<br>CD70-<br>mEGFP     | mEGFP             | Nanobody                               | 1H1                     | R3 | ALFA-tag | Nanobody | 1G5  | R4 | 75 | 30 000 | 25 | 500 | 10 | 10 |
| BSC1       | mEGFP-<br>CD70-<br>ALFA     | mEGFP             | Nanobody                               | 1H1                     | R3 | ALFA-tag | Nanobody | 1G5  | R4 | 75 | 30 000 | 25 | 500 | 10 | 10 |
| CHO-<br>K1 | PD-L1-<br>ALFA-<br>mEGFP    | PD-L1             | Antibody                               | 10F.9<br>G2             | R4 | ALFA-tag | Nanobody | 1G5  | R3 | 75 | 30 000 | 25 | 500 | 10 | 10 |
| CHO-<br>K1 | CD80-<br>ALFA-<br>mEGFP     | CD80              | Antibody                               | 16-<br>10A1             | R3 | ALFA-tag | Nanobody | 1G5  | R4 | 75 | 30 000 | 25 | 500 | 10 | 10 |
| CHO-<br>K1 | CD86-<br>ALFA-<br>mEGFP     | CD86              | Antibody                               | GL-1                    | R1 | ALFA-tag | Nanobody | 1G5  | R4 | 75 | 30 000 | 25 | 500 | 10 | 10 |
| CHO-<br>K1 | EGFR-<br>ALFA-<br>mEGFP     | EGFR              | Affibody                               | AB951<br>16             | R3 | ALFA-tag | Nanobody | 1G5  | R4 | 75 | 30 000 | 25 | 500 | 10 | 10 |
| CHO-<br>K1 | EGFR-<br>ALFA-<br>mEGFP     | mEGFP             | Nanobody                               | 1H1<br>1B2              | R3 | ALFA-tag | Nanobody | 1G5  | R4 | 75 | 30 000 | 25 | 500 | 10 | 10 |
| CHO-<br>K1 | EGFR-<br>ALFA-<br>mEGFP     | EGFR              | Antibody +<br>2 <sup>nd</sup> Nanobody | 199.12<br>+ kLC<br>1A23 | R3 | ALFA-tag | Nanobody | 1G5  | R4 | 75 | 30 000 | 25 | 500 | 10 | 10 |

|        |                 |      |                                     |                   |    |          |          |     |    |    |        |    |     |    |    |
|--------|-----------------|------|-------------------------------------|-------------------|----|----------|----------|-----|----|----|--------|----|-----|----|----|
| CHO-K1 | EGFR-ALFA-mEGFP | EGFR | Antibody + 2 <sup>nd</sup> Nanobody | D38B1 + IgG 10E10 | R3 | ALFA-tag | Nanobody | 1G5 | R4 | 75 | 30 000 | 25 | 500 | 10 | 10 |
|--------|-----------------|------|-------------------------------------|-------------------|----|----------|----------|-----|----|----|--------|----|-----|----|----|

**Supplementary Table 8 | Acquisition parameters for EGFR experiments**

| Cell   | Construct       | Target | Binder                              | Clone             | Imager-Sequence | Reference | Binder   | Clone | Imager-Sequence | Exposure (ms) | Frames TARGET / REFERENCE(n) | Power (at objective, mW) | Imager concentration -TARGET / REFERENCE (pM) | Cluster radius xy | Cluster N <sub>min</sub> |
|--------|-----------------|--------|-------------------------------------|-------------------|-----------------|-----------|----------|-------|-----------------|---------------|------------------------------|--------------------------|-----------------------------------------------|-------------------|--------------------------|
| CHO-K1 | EGFR-ALFA-mEGFP | mEGFP  | Nanobody                            | 1H1 1B2           | R3              | ALFA-tag  | Nanobody | 1G5   | R4              | 75            | 50 000 / 30 000              | 25                       | 250 / 500                                     | 10                | 10                       |
| CHO-K1 | EGFR-ALFA-mEGFP | EGFR   | Antibody + 2 <sup>nd</sup> Nanobody | 199.12 + kLC 1A23 | R1              | ALFA-tag  | Nanobody | 1G5   | R4              | 75            | 50 000 / 30 000              | 25                       | 250 / 500                                     | 10                | 10                       |
| CHO-K1 | EGFR-ALFA-mEGFP | EGFR   | Antibody + 2 <sup>nd</sup> Nanobody | D38B1 + IgG 10E10 | R6              | ALFA-tag  | Nanobody | 1G5   | R4              | 75            | 50 000 / 30 000              | 25                       | 250 / 500                                     | 10                | 10                       |

**Supplementary Table 9 | Imager sequences**

| Imager name | Sequence | 3'-mod |
|-------------|----------|--------|
| R1          | AGGAGGA  | Cy3b   |
| R3          | AGAGAGA  | Cy3b   |
| R4          | GTGTGT   | Cy3b   |
| R6          | TGTTGTT  | Cy3b   |

**Supplementary Table 10 | Binder specificity**

| Target     | Binder                              | Clone             | Total area ( $\mu\text{m}^2$ ) | Binder density ( $\mu\text{m}^2$ ) | Cells (n) | Repeats (n) |
|------------|-------------------------------------|-------------------|--------------------------------|------------------------------------|-----------|-------------|
| mEGFP      | Nanobody                            | 1H1               | 331.8 $\pm$ 0.0                | 0.19 $\pm$ 0.05                    | 5         | 2           |
| mEGFP      | Nanobody                            | 1B2               | 331.8 $\pm$ 0.0                | 0.23 $\pm$ 0.05                    | 5         | 2           |
| ALFA-tag   | Nanobody                            | 1G5               | 404.8 $\pm$ 31.9               | 0.06 $\pm$ 0.05                    | 5         | 2           |
| mCherry    | Nanobody                            | 2B12              | 331.8 $\pm$ 0.0                | 0.61 $\pm$ 0.56                    | 5         | 2           |
| TagRFP     | Nanobody                            | 1H7               | 331.8 $\pm$ 0.0                | 0.41 $\pm$ 0.15                    | 5         | 2           |
| mEOS2      | Nanobody                            | 1E8               | 331.8 $\pm$ 0.0                | 0.35 $\pm$ 0.09                    | 5         | 2           |
| mNeonGreen | Nanobody                            | 1E2               | 331.8 $\pm$ 0.0                | 0.30 $\pm$ 0.09                    | 5         | 2           |
| SPOT-tag   | Nanobody                            | bivBC2            | 331.8 $\pm$ 0.0                | 0.46 $\pm$ 0.12                    | 5         | 2           |
| PD-L1      | Antibody (TransGlutaminase)         | 10F.9G2           | 331.8 $\pm$ 0.0                | 0.31 $\pm$ 0.02                    | 5         | 2           |
| PD-L1      | Antibody (GlyCLICK)                 | 10F.9G2           | 331.8 $\pm$ 0.0                | 0.28 $\pm$ 0.10                    | 5         | 2           |
| CD80       | Antibody (TransGlutaminase)         | 16-10A1           | 338.5 $\pm$ 13.0               | 0.21 $\pm$ 0.05                    | 5         | 2           |
| CD80       | Antibody (GlyCLICK)                 | 16-10A1           | 371.7 $\pm$ 31.9               | 0.39 $\pm$ 0.09                    | 5         | 2           |
| CD86       | Antibody (TransGlutaminase)         | GL-1              | 351.7 $\pm$ 26.0               | 0.18 $\pm$ 0.03                    | 5         | 2           |
| CD86       | Antibody (GlyCLICK)                 | GL-1              | 345.1 $\pm$ 26.0               | 0.37 $\pm$ 0.05                    | 5         | 2           |
| EGFR       | Affibody                            | AB95116           | 348.4 $\pm$ 32.5               | 0.62 $\pm$ 0.21                    | 8         | 2           |
| EGFR       | Antibody + 2 <sup>nd</sup> Nanobody | 199.12 + kLC 1A23 | 331.8 $\pm$ 0.0                | 0.37 $\pm$ 0.08                    | 5         | 2           |
| EGFR       | Antibody + 2 <sup>nd</sup> Nanobody | D38B1 + IgG 10E10 | 331.8 $\pm$ 0.0                | 0.38 $\pm$ 0.11                    | 5         | 2           |
